# Supplementary material for: The Use of Patient-Reported Outcome Measures in Daily Clinical Practice of a Pediatric Nephrology Department
Source: Int J Environ Res Public Health. 2022 Apr 27;19(9):5338. doi: 10.3390/ijerph19095338 (PMC9102002; doi:10.3390/ijerph19095338)
Supplement: Supplementary file 1 [file ijerph-19-05338-s001.zip › ijerph-1692907-supplementary.pdf]

## **Supplementary Files**

*International Journal of Environmental Health and Public Research*

Supplement to:

*The use of Patient-Reported Outcome Measures in daily clinical practice of a pediatric nephrology department.*

Floor Veltkamp, Lorynn Teela, Hedy A. van Oers, Lotte Haverman, Antonia H.M. Bouts.

**Corresponding author:** Antonia H.M. Bouts, Emma Children's Hospital, Amsterdam UMC, University of Amsterdam, Department of Pediatric Nephrology, Meibergdreef 9, 1105 AZ Amsterdam, the Netherlands; a.h.bouts@amsterdamumc.nl.

**Table S1:** Overview of all PROMs that are currently used for the Chronic Kidney Disease group and the Kidney Transplantation group at the pediatric nephrology department of the Emma Children's Hospital.

| Age range                          | Proxy-report              |                   | Self-report              |                |             | Frequency      |
|------------------------------------|---------------------------|-------------------|--------------------------|----------------|-------------|----------------|
|                                    | 0-1 year                  | 2-7 years         | 8-11 years               | 12-15 years    | 16-18 years |                |
| <b>Informed consent</b>            | Parent                    | Parent            | Parent                   | Parent + Child | Child       | Once           |
| <b>PROM</b>                        | <b>Parent about self</b>  |                   | <b>Parent about self</b> |                |             |                |
| <b>Sociodemographic</b>            | Sociodemographic          |                   | Sociodemographic         |                |             | 1x per 2 years |
| <b>Symptoms of distress</b>        | DT-P                      |                   | DT-P                     |                |             | Once a year    |
| <b>PROM</b>                        | <b>Parent about child</b> |                   | <b>Child about self</b>  |                |             |                |
| <b>HRQoL child</b>                 | TAPQOL                    | PedsQL / TAPQOL*  | PedsQL                   |                |             | Each visit     |
| <b>HRQoL (Transplantation)</b>     | NA                        | PedsQL Transplant | PedsQL Transplant        |                |             | Each visit     |
| <b>Skill for growing up</b>        | NA                        |                   |                          |                |             | Once a year    |
| <b>Problems with medication</b>    | Problems with medication  |                   | Problems with medication |                |             | Each visit     |
| <b>Therapy compliance</b>          | Therapy compliance        |                   | Therapy compliance       |                |             | Each visit     |
| <b>Medication &amp; appearance</b> | NA                        |                   | Medication & appearance  |                |             | Each visit     |
| <b>School</b>                      | NA                        |                   | School                   |                |             | Each visit     |

\* In 2018, the TAPQOL was replaced by the PedQL 4.0 (2-4) and PedsQL (5-7) for patients aged 2-5 years.

For each age group using the PedsQL questionnaires, age-specific PROMs are provided (PedsQL 2-4 years, PedsQL 5-7 years, PedsQL 8-12 years, and PedsQL 13-18 years). PROMs measuring disease-specific HRQoL concerning transplantation are only completed by patients who underwent a kidney transplant. The PROM measuring problems with medication is only completed by the Chronic Kidney Disease group. HRQoL = Health-related quality of life; NA = Not applicable; DT-P = Distress Thermometer for Parents, PedsQL = Pediatric Quality of Life Generic Inventory 4.0; PROM = Patient reported outcome measure; TAPQOL = TNO-AZL Preschool children Quality Of Life.
